# Supplementary material
Source: PubMed Central journal article supplement (PMC3666348)
Supplement: NIHMS469359-supplement-supplemental_material.pdf [file NIHMS469359-supplement-supplemental_material.pdf]

# Acute Bronchitis in Children, Adolescents, and Adults

## Key points

- More than 90% of acute cough illnesses are non-bacterial
- Multiple studies show that patients with acute bronchitis do not benefit from antibiotic therapy
- Symptoms may last up to 3 weeks
- Evaluation should focus on excluding pneumonia or other severe disease
- Purulent green or yellow sputum alone is not predictive of bacterial infection

## Possible signs and symptoms of acute bronchitis ("chest cold"):

- Productive cough (may be dry the first few days)
- Chest soreness
- Wheezing
- Fatigue
- Mild headache
- Mild body aches
- Low-grade fever (less than 102°F)

\*\*Acute exacerbation of COPD not covered in this guideline\*\*

## Differential diagnosis:

- Non-specific URI
- Asthma
- Community-acquired pneumonia
- Acute exacerbation of COPD
- Post-nasal drip

Clinical picture consistent with acute bronchitis

## Any of the following present? (may suggest pneumonia)

- Ill-appearing
- High fever or other constitutional symptoms
- Tachypnea
- Tachycardia
- Evidence of lung consolidation on physical exam

Yes

No

Chest X-ray  
(if available)

Infiltrate

No infiltrate

Uncomplicated acute bronchitis likely\*

Refer to guideline for  
community-acquired  
pneumonia

Antibiotic therapy not indicated\*

Recommend specific symptomatic therapy:

### Children

- Encourage fluids
- Fever control (acetaminophen or NSAIDs)

### Adults

- Bronchodilator ( $\beta$ -agonist) therapy shortens the duration of cough
- Dextromethorphan or codeine for cough
- Acetaminophen or NSAIDs for fever/pain

Implement communication tips from page 1

**Disclaimer:** This is intended only as a guide for evidence-based decision-making; it is not intended to replace clinical judgment  
**References:** <http://www.cdc.gov/getsmart/campaign-materials/info-sheets/adult-acute-cough-illness.html> (accessed 12/30/09); *Ann Intern Med* 2000; 133:981-991

\*If pertussis or influenza are suspected clinically, initiate diagnostic testing and consider empiric therapy

# Nonspecific Upper Respiratory Tract Infection in Children, Adolescents, and Adults

## Key points

- Nonspecific upper respiratory tract infection (URI), or the “common cold,” is caused by viral pathogens
- Symptoms may last up to 10-14 days
- Treatment with an antibiotic does not shorten duration of illness or prevent bacterial sinusitis
- Purulent green or yellow secretions alone are not predictive of bacterial infection

## Possible signs and symptoms of nonspecific URI or the “common cold”:

- Sore throat
- Nasal congestion or discharge
- Cough
- Sneezing
- Sore throat
- Headache
- Malaise
- Low-grade fever

## Differential diagnosis:

- Acute bronchitis
- Acute rhinosinusitis
- Acute pharyngitis
- Allergic rhinitis
- Pertussis\*
- Influenza\*

Clinical picture consistent with nonspecific URI

**Antibiotic therapy not indicated\***

**Recommend specific symptomatic therapy:**

### Children

- Encourage fluids
- Fever control (acetaminophen or NSAIDs)

### Adults

- Dextromethorphan or codeine for cough
- Acetaminophen or NSAIDs for fever/pain
- Consider decongestant

**Implement communication tips from page 1**

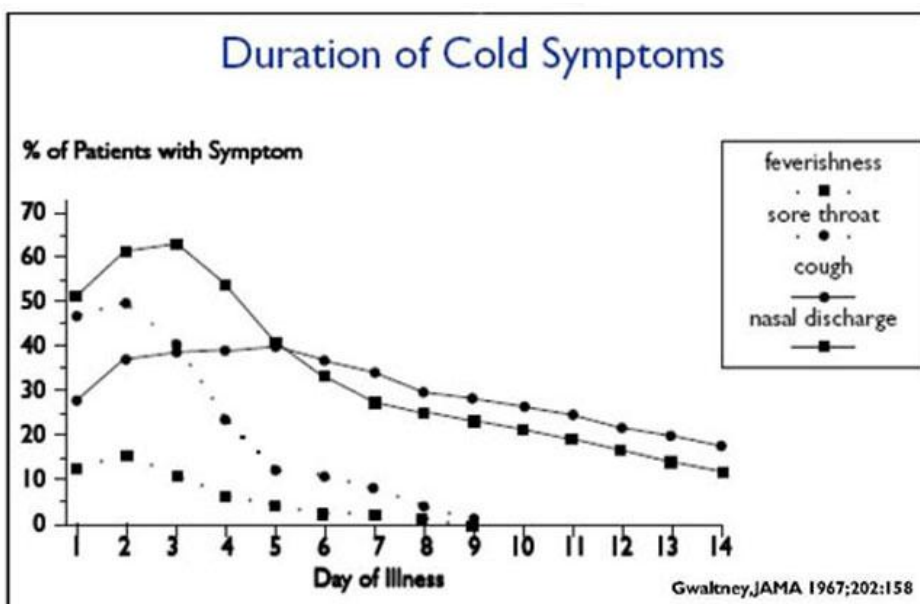

**Disclaimer:** This is intended only as a guide for evidence-based decision-making; it is not intended to replace clinical judgment

**References:** <http://www.cdc.gov/getsmart/campaign-materials/info-sheets/adult-nurti.html> (accessed 12/30/09);

<http://www.cdc.gov/getsmart/campaign-materials/info-sheets/child-rhin-vs-sinus.html> (accessed 12/30/09)

\*If pertussis or influenza are suspected, initiate diagnostic testing and consider empiric therapy

# Acute Rhinosinusitis in Non-Pregnant Adults

## Key points

- Most cases of acute rhinosinusitis are due to viral infections
- Purulent yellow or green nasal discharge alone is not predictive of bacterial infection
- Antibiotic therapy for acute viral sinusitis will not shorten duration of illness or prevent bacterial infection
- Use the strict criteria below for diagnosis of bacterial sinusitis

## Possible signs and symptoms of acute rhinosinusitis (present <4 weeks):

- |                          |                             |
|--------------------------|-----------------------------|
| 1) Nasal discharge       | 5) Fever                    |
| 2) Nasal congestion      | 6) Cough                    |
| 3) Facial pressure/pain  | 7) Ear pressure or fullness |
| 4) Maxillary dental pain | 8) Anosmia                  |

Clinical picture suggestive of acute rhinosinusitis?  
(clinical diagnosis – radiographs are not necessary)

Yes

No

Consider alternative etiologies

Present for more than 7-10 days and not improving  
OR  
Worsening after initial improvement  
OR  
Severe symptoms (moderate-severe pain or temperature  $\geq 38.3$  C or 101 F)

No

Yes

**Likely viral etiology,  
antibiotic therapy  
not indicated**

**Bacterial etiology  
more likely, initiate  
antibiotic therapy**

Antibiotic treatment  
within last 4-6 weeks?

Start therapy to relieve obstruction  
and alleviate symptoms

- NSAIDs or acetaminophen for pain
- Nasal saline washes
- Consider:*
- Topical glucocorticoid (nasal)
- Decongestants (nasal or systemic)

Duration more than 10 days  
OR  
Worsening symptoms\*

Yes

No

**1<sup>st</sup> line:**  
**Amoxicillin-clavulanate**  
875mg BID for **7-10 days**  
OR  
**Levofloxacin** 500mg QDay  
for **7-10 days**

**1<sup>st</sup> line:**  
**Amoxicillin** 500mg TID  
for **7-10 days**  
  
*Alternatives (7-10 days):*  
Doxycycline 100mg BID or  
TMP-SMX 1DS BID

Absence of clinical response  
within 7 days

**Change antibiotic  
therapy if drug-resistant  
infection suspected**

Consider drug-resistant infection,  
alternative etiologies, or complications\*

**Disclaimer:** This is intended only as a guide for evidence-based decision-making; it is not intended to replace clinical judgment. Assess for antibiotic allergies and use alternative agents as appropriate. Suggested antibiotic doses are for normal renal function; adjust for renal impairment when necessary.

**References:** Clinical Practice Guideline: Adult Sinusitis. Otolaryngology – Head and Neck Surgery 2007; 135:S1-S3;  
<http://www.cdc.gov/getsmart/campaign-materials/info-sheets/adult-acute-bact-rhino.html> (accessed 12/30/09)

\*Complications of acute sinusitis may include meningitis, orbital cellulitis, osteomyelitis of sinus bones, invasive fungal superinfection

# Acute Pharyngitis in Children >5 years, Adolescents, and Adults

## Key points

- Group A streptococci cause 15%–30% of cases of acute pharyngitis in pediatric patients, but only 5%–10% of such illnesses in adults
- Diagnosis of Group A streptococcal pharyngitis requires diagnostic testing as clinical assessment alone is not sufficiently accurate
- Limit antibiotic therapy to patients with a positive test for Group A streptococcus
- Penicillin is the preferred therapy

Suspected uncomplicated acute pharyngitis

## Any factors associated with Group A streptococcal pharyngitis present?

- Fever (>38 C or 100.3 F)
- Tonsillar swelling or exudates
- Tender anterior cervical lymph nodes
- Absence of a cough, coryza, conjunctivitis, diarrhea
- Palatine petechiae

Yes

No

Possible Group A streptococcal pharyngitis

Viral etiology likely\*\*

Perform rapid antigen detection test, if available

Positive

Negative

Perform throat culture

Positive

Negative

Initiate antibiotic therapy

Antibiotic therapy not indicated

Recommend specific symptomatic therapy:

- Acetaminophen or NSAIDs for fever/pain

Implement communication tips from page 1

## \*\*Other etiologies of acute pharyngitis to consider:

- *F. necrophorum*
- *C. diphtheriae*
- *M. pneumoniae*
- *N. gonorrhoea*
- Infectious mononucleosis
- Primary HIV infection
- HSV
- Influenza

|                       | Antibiotic          | Adults/Adolescents >60lbs  | Children <60lbs                             |
|-----------------------|---------------------|----------------------------|---------------------------------------------|
| 1 <sup>st</sup> line: | Penicillin V        | 500mg TID                  | 50mg/kg divided BID or TID (max 500mg/dose) |
|                       | or Amoxicillin      | 500mg TID                  | 50mg/kg divided BID or TID (max 1gm BID)    |
|                       | or Benzathine PCN G | 1.2 million units IM once  | 600,000 units IM once                       |
| Alternatives:         | Cephalexin          | 500mg BID                  | 25-50mg/kg divided BID (max 500mg/dose)     |
|                       | Azithromycin†       | 500mg x 1, then 250mg QDay | 12mg/kg QDay (max 500mg/day)                |

Recommended duration of oral therapy: 10 days†

**Disclaimer:** This is intended only as a guide for evidence-based decision-making; it is not intended to replace clinical judgment. Assess for antibiotic allergies and use alternative agents as appropriate. Suggested antibiotic doses are for normal renal function; adjust for renal impairment when necessary.

**Reference:** Practice Guidelines for the Diagnosis and Management of Group A Streptococcal Pharyngitis. *Clin Infect Dis* 2002; 35:113-25; American Academy of Pediatrics. *Red Book 2009: Report of the Committee on Infectious Diseases*, 28th ed.

† recommended duration of azithromycin is 5 days

# Urinary Tract Infection in Non-Pregnant Adults

## Key points

- *E.coli* remains the most common cause of both simple cystitis and complicated urinary tract infection
- Heavy fluoroquinolone use has led to widespread emergence of quinolone-resistant *E. coli* at DH
- Screen for risk factors for fluoroquinolone resistance when considering their use

## Possible signs and symptoms of urinary tract infection:

- 1) Urinary frequency
- 2) Urgency
- 3) Dysuria
- 4) Suprapubic pain
- 5) Hematuria

Clinical picture suggestive of urinary tract infection?

**Yes**

**No**

### Any complicating factors present? (associated with broader spectrum of bacteria and/or increased risk of complications)

|                            |                           |                          |
|----------------------------|---------------------------|--------------------------|
| Male gender                | Immunosuppression         | Renal insufficiency      |
| Systemic symptoms          | Nephrolithiasis           | Urinary catheter         |
| Symptoms >7 days           | Urinary obstruction       | Recent treatment failure |
| Diabetes mellitus          | Anatomical GU abnormality | Recent hospitalization   |
| Evidence of pyelonephritis | Recent GU instrumentation |                          |

Consider alternative etiologies

**No**

**Yes**

**Simple cystitis**

**Complicated infection**

Urine culture generally not indicated<sup>†</sup>

- Obtain urinalysis and culture
- Blood cultures if systemic signs/symptoms

### 1<sup>st</sup> line:

**Nitrofurantoin<sup>§</sup> 100mg PO BID for 5 days<sup>a</sup>**

### Alternatives:

Ciprofloxacin 250mg PO BID for 3 days

Trimethoprim-sulfamethoxazole DS 1 tab PO BID for 3 days (if *E.coli* resistance rate < 15%)

Clinical evidence of pyelonephritis?

|              |                   |                |
|--------------|-------------------|----------------|
| - Fever      | - Nausea/vomiting | - Leukocytosis |
| - Flank pain | - CVA tenderness  |                |

**No**

**Yes**

**Complicated UTI**

**Pyelonephritis**

### Risk factors for fluoroquinolone (FQ) resistance present?<sup>b</sup>:

- 1) Hospitalization in previous 12 months OR
- 2) Fluoroquinolone use in previous 12 months OR
- 3) Prior documented FQ-resistant organism

**Yes**

**Yes**

**No**

**Moderate to severe illness**

**Mild illness**

**Levofloxacin 500mg PO daily (use 750mg if risk for FQ resistance) OR Ciprofloxacin 500mg PO BID (use 750mg BID if risk for FQ resistance)**

**If appropriate for outpatient therapy:**  
**Ceftriaxone 1gm IV or IM daily OR**  
**Amikacin 10mg/kg IV or IM daily if *Pseudomonas* likely or if serious cephalosporin allergy**

**Adjust antibiotics based on cultured organism and susceptibilities**

**Treatment duration varies by clinical scenario: 5-14 days\***

**If quinolone-resistant AND ceftriaxone-susceptible organism:**  
**Cefixime 400mg PO daily**  
\*not for empiric use for suspected quinolone resistance

**Disclaimer:** This is intended only as a guide for evidence-based decision-making; it is not intended to replace clinical judgment. Assess for antibiotic allergies and use alternative agents as appropriate. Suggested doses are for normal renal function; adjust for renal impairment.

<sup>†</sup>Consider evaluation for gonorrhea and chlamydia in sexually active patients; treat appropriately if confirmed

<sup>§</sup>Nitrofurantoin is contraindicated in patients with a creatinine clearance of less than 60 mL/min

<sup>\*</sup>5 days of levofloxacin 750mg daily effective for complicated UTI/acute pyelonephritis (*Urology* 2008; 71:17-22)

**References:** <sup>a</sup>*Arch Intern Med* 2007;167:2207-12; <sup>b</sup>*Am J Med* 2008;121:876-884

# Skin and Soft Tissue Infection in Non-Pregnant Adults

## Key points

- Beta-hemolytic streptococci are the most common cause of cellulitis without abscess
- MRSA is the most common cause of simple abscess
- Drainage is the primary therapy for simple abscess; several studies show that antibiotic therapy does not add benefit to drainage alone
- Short-course antibiotic therapy has been shown to be as effective as longer courses

## Possible signs and symptoms of skin and soft tissue infection (SSTI):

- |                       |                            |
|-----------------------|----------------------------|
| 1) Cutaneous erythema | 4) Pain                    |
| 2) Cutaneous warmth   | 5) Tenderness to palpation |
| 3) Swelling           | 6) Fever                   |

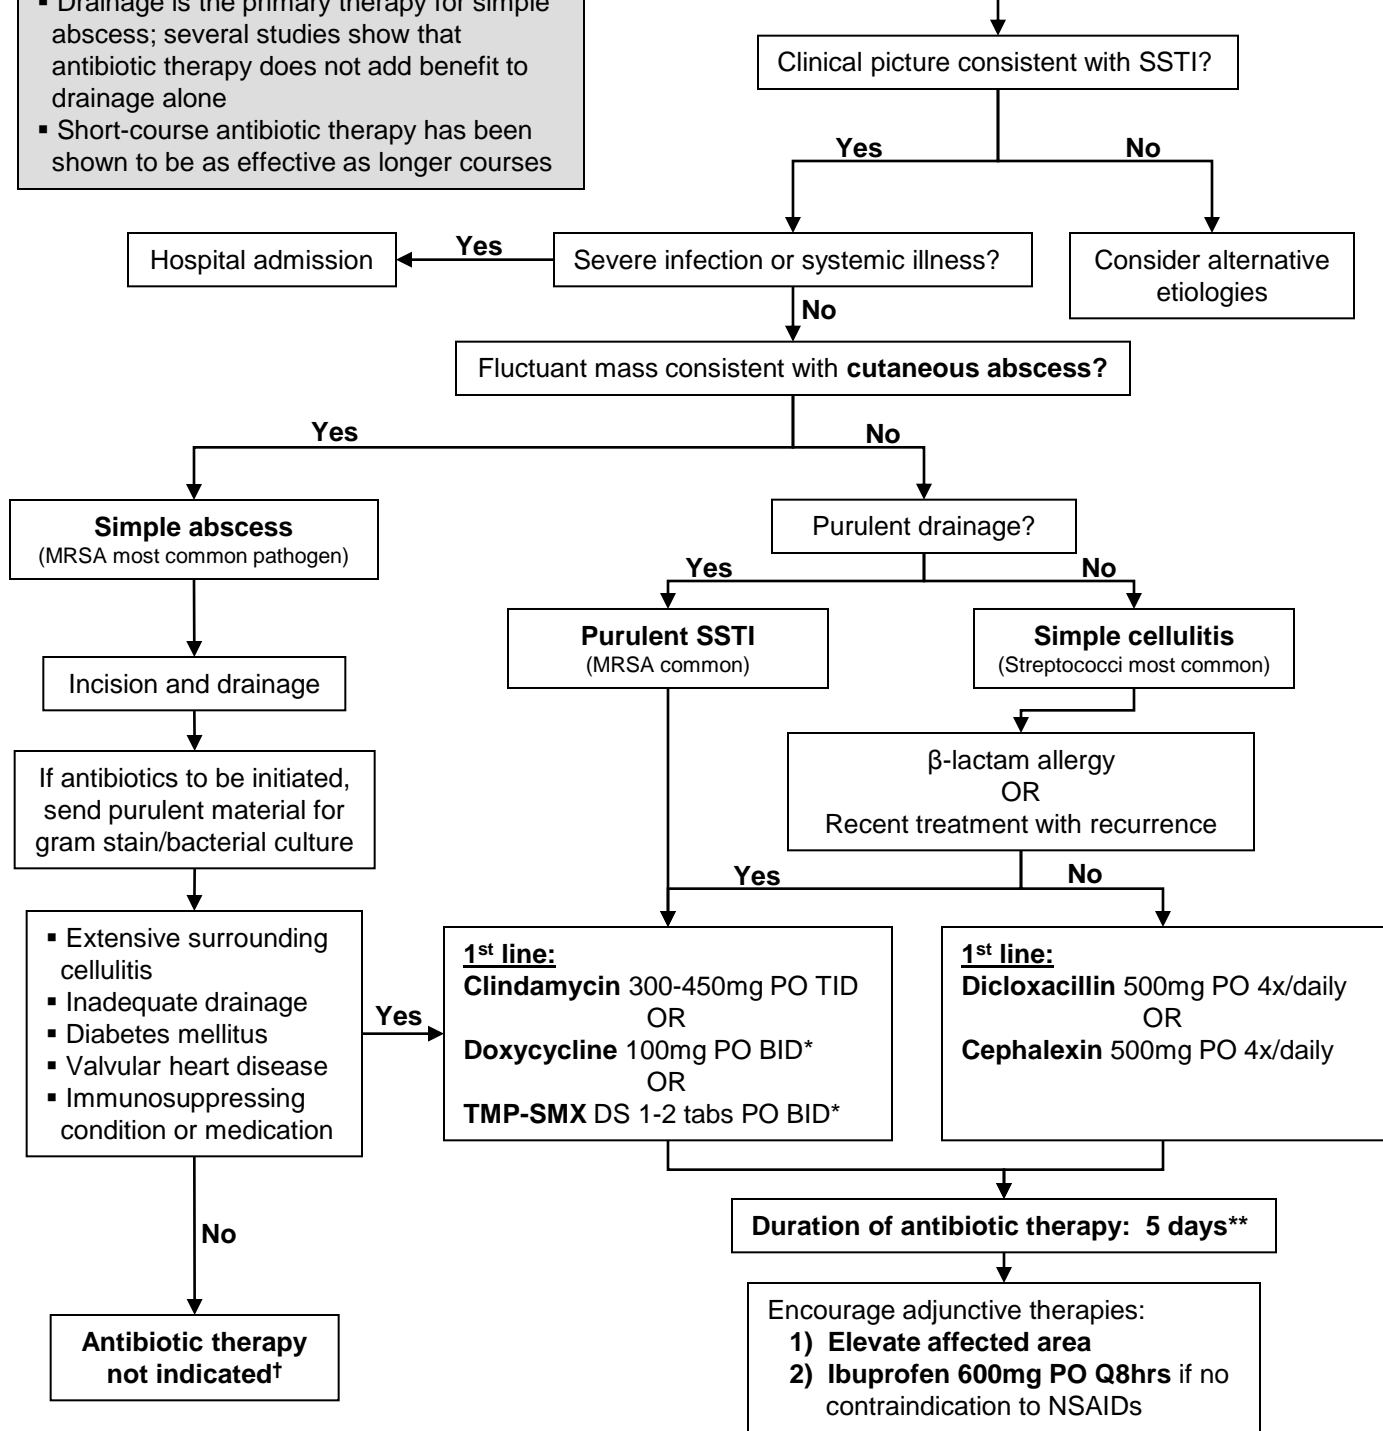

**Disclaimer:** This is intended only as a guide for evidence-based decision-making; it is not intended to replace clinical judgment. Assess for antibiotic allergies and use alternative agents as appropriate. Suggested antibiotic doses are for normal renal function; adjust for renal impairment when necessary.

\*Trimethoprim-sulfamethoxazole and doxycycline may lack sufficient coverage against Grp A streptococci; not recommended for simple cellulitis  
\*\*duration of therapy may be extended for poorly responsive disease

†several studies suggest incision and drainage alone may be sufficient for immunocompetent patients with skin abscess: *Antimicrob Agents Chemother* 2007;51:4044-8; *NEJM* 2006;355:666-74; *Arch Surg* 2006;141:850-4

Other references: *Clin Infect Dis* 2005;41:1373-1406

# Community-Acquired Pneumonia in Non-Pregnant Adults

## Key points

- Avoid diagnosing CAP without radiographic evidence of pneumonia
- Multiple studies suggest short-course antibiotic therapy is as effective as longer courses

## Possible signs and symptoms of community-acquired pneumonia (CAP):

- |                        |                                 |
|------------------------|---------------------------------|
| 1) Cough               | 5) Pleuritic chest pain         |
| 2) Shortness of breath | 6) Tachycardia                  |
| 3) Fever               | 7) Tachypnea                    |
| 4) Sputum production   | 8) Rales, egophany, or fremitus |

Clinical picture suggestive of CAP

Yes

No

Obtain chest radiograph (CXR)  
Consider complete blood count

Consider alternative etiologies

Infiltrate present on CXR

No infiltrate on CXR\*

Does not meet criteria for CAP\*

### 2 or more CURB-65 criteria?

- Confusion – new onset disorientation to person, place, or time
- Uremia – BUN >20
- Respiratory rate >30
- Blood pressure – systolic <90 OR diastolic <60
- 65 – age >65

Yes

No

Consider hospital admission

No

Appropriate for outpatient therapy based on other medical and social needs?

Yes

### Any risk factors for drug-resistant *S. pneumoniae*?†

- Use of antibiotics within 3 months
- Uncontrolled diabetes mellitus
- Chronic medical condition with frequent health care contact
- Alcoholism
- Asplenia
- Immunosuppressing conditions or medications

Yes

No

**1<sup>st</sup> line: Levofloxacin 750mg QDay for 5 days\*\***

Alternative: Amoxicillin 1gm TID *plus*  
Doxycycline 100mg BID for 7 days

**1<sup>st</sup> line: Doxycycline 100mg BID for 7 days**

Alternative: Azithromycin 500mg QDay for 3 days

**Disclaimer:** This is intended only as a guide for evidence-based decision-making; it is not intended to replace clinical judgment. Assess for antibiotic allergies and use alternative agents as appropriate. Suggested antibiotic doses are for normal renal function; adjust for renal impairment when necessary.

\*CXR may be negative early in the course of pneumonia; consider a repeat CXR in 24 hours if suspicion for CAP remains high

\*\*Avoid use of fluoroquinolones if risk factors for *M. tuberculosis* present (born outside United States), as may lead to delay in TB diagnosis

†Conditions associated with drug-resistant *Streptococcus pneumoniae* warrant expanded coverage

Reference: Infectious Diseases Society of America/American Thoracic Society Consensus Guidelines on the Management of Community-Acquired Pneumonia in Adults. *Clin Infect Dis* 2007; 44:S27-72

# Acute Otitis Media (AOM) in Children and Adolescents

## Key points

- Most cases (>80%) of AOM are viral and resolve spontaneously
- Consider observation for 48-72hrs in children >6 months
- Middle ear effusion and inflammation must be present for diagnosis

## Signs and symptoms of acute otitis media (not all may be present):

- Recent onset of symptoms
- Otalgia (more common age>2)
- Fever (30-50%)
- Crying, fussiness
- Ear pulling (non-specific)
- URI symptoms
- Loss of appetite
- Vomiting, diarrhea

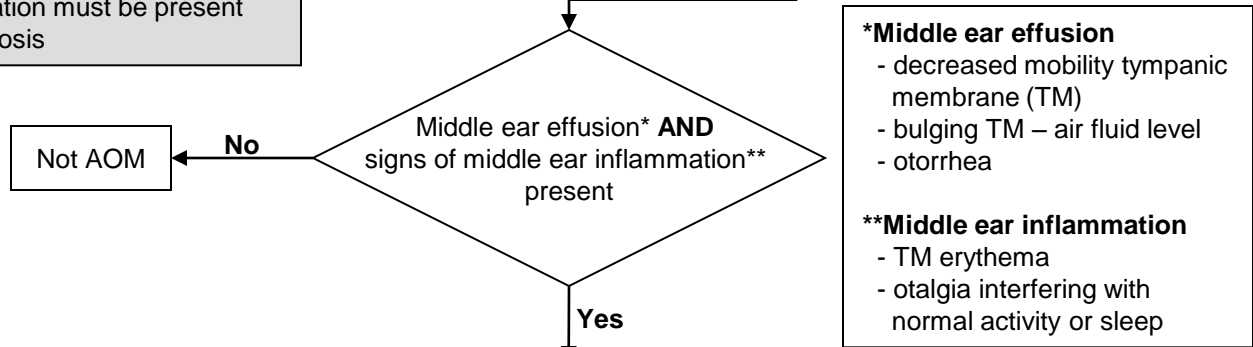

**Treat pain**

- acetaminophen (or NSAID if >6 months)
- warm compresses
- topical anesthetic (if TM intact)

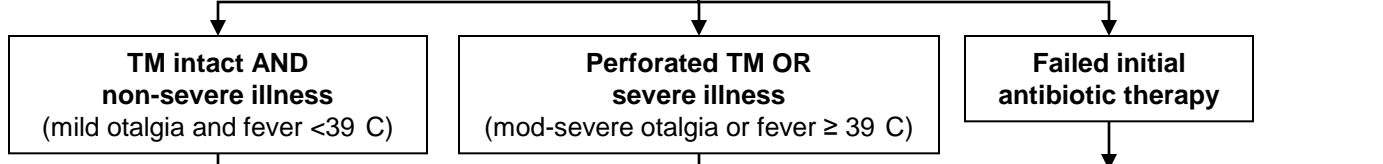

**TM intact AND non-severe illness**  
(mild otalgia and fever <39 C)

**Perforated TM OR severe illness**  
(mod-severe otalgia or fever ≥ 39 C)

**Failed initial antibiotic therapy**

Consider observation for 48-72hrs (if >6 months)  
**OR**  
Delayed antibiotic prescription† to fill if symptoms don't improve in 48-72hrs

**Resolution**

**Observation failure or treatment chosen**

**†1<sup>st</sup> line initial therapy:**  
**Amoxicillin** 80-90mg/kg/day divided BID (max 1gm BID) for:  
 • **10 days** if <6 years  
 • **5 days** if ≥6 years

**Alternatives for non-severe PCN allergy:**  
 Cefdinir 14mg/kg/d divided BID (max 300mg BID) OR  
 Cefpodoxime 10mg/kg/day divided BID (max 400mg BID) OR  
 Cefuroxime 30mg/kg/day divided BID (max 500mg BID)

**Immediate hypersensitivity PCN allergy:**  
 Azithromycin 10mg/kg on day 1 (max 500mg), then 5mg/kg (max 250mg) days 2- 5

**1<sup>st</sup> line:**  
**Amoxicillin/clavulanate** 90/6.4 mg/kg/day divided BID (max 875mg BID) for **10 days**

**Alternatives for non-severe PCN allergy:**  
 Cefpodoxime 10mg/kg/day divided BID (max 400mg BID) OR  
 Cefuroxime 30mg/kg/day divided BID (max 500mg BID)

**If severe illness:**  
 Ceftriaxone IM 50mg/kg/day for 3 days (max 1gm/day)

**Immediate hypersensitivity PCN allergy:**  
 Clindamycin 30mg/kg/day divided TID (max 450mg TID) or consider tympanocentesis

**No improvement after 48-72 hours**

**Disclaimer:** This is intended only as a guide for evidence-based decision-making; it is not intended to replace clinical judgment. Assess for antibiotic allergies and use alternative agents as appropriate. Suggested antibiotic doses are for normal renal function; adjust for renal impairment when necessary.  
**References:** Diagnosis and Management of Acute Otitis Media (AAP/AAFP Clinical Practice Guideline). *Pediatrics* 2004;113:1451-1465; American Academy of Pediatrics. *Red Book 2009: Report of the Committee on Infectious Diseases*, 28th ed.



# Acute Rhinosinusitis in Children and Adolescents

## Key points

- Most cases of acute rhinosinusitis are due to viral infections
- Purulent yellow or green nasal discharge alone is not predictive of bacterial infection
- Antibiotic therapy for acute viral sinusitis will not shorten duration of illness or prevent bacterial infection
- Use the strict criteria below for diagnosis of bacterial sinusitis

## Possible signs and symptoms of acute rhinosinusitis (present <4 weeks):

- |                            |                             |
|----------------------------|-----------------------------|
| 1) Nasal discharge         | 5) Fever                    |
| 2) Nasal congestion        | 6) Cough                    |
| 3) Facial pressure or pain | 7) Ear pressure or fullness |
| 4) Maxillary dental pain   | 8) Anosmia                  |

Clinical picture suggestive of acute rhinosinusitis?  
(clinical diagnosis – radiographs are not necessary)

Yes

No

Present for more than 10 days and not improving  
OR  
Worsening after initial improvement  
OR  
Severe symptoms (temperature  $\geq 39$  C or 102.2 F with purulent discharge, facial pain/tenderness, periorbital swelling)

Consider alternative etiologies

If severe, consider further evaluation/hospitalization

No

Yes

Likely viral etiology,  
antibiotic therapy  
not indicated

Bacterial etiology  
more likely, initiate  
antibiotic therapy

Antibiotic treatment  
within last 4-6 weeks OR  
Severe symptoms OR  
Daycare attendee

Yes

No

Start therapy to relieve obstruction  
and alleviate symptoms

- NSAIDs or acetaminophen
- Nasal saline washes

**1<sup>st</sup> line:**  
Amoxicillin-clavulanate 90/6.4 mg/kg/day divided BID (max 875mg BID) OR  
Cefdinir 14mg/kg/d divided BID (max 300mg BID) OR  
Cefpodoxime 10mg/kg/day divided BID (max 400mg BID) OR  
Cefuroxime 30mg/kg/day divided BID (max 500mg BID)  
Duration: **7-10 days**

**1<sup>st</sup> line:**  
Amoxicillin 80-90mg/kg/day divided BID or TID (max 1gm BID) for 7 -10 days

**If immediate hypersensitivity PCN allergy:**  
Azithromycin 10mg/kg on day 1 (max 500mg), then 5mg/kg (max 250mg) days 2- 5

Duration more than 10 days  
OR  
Worsening symptoms\*

Initiate antibiotic therapy as above

Absence of clinical response within 7 days

Change antibiotic therapy if drug-resistant infection suspected

Consider drug-resistant infection, ongoing sinus obstruction, alternative etiologies, or complications\*

**Disclaimer:** This is intended only as a guide for evidence-based decision-making; it is not intended to replace clinical judgment. Assess for antibiotic allergies and use alternative agents as appropriate. Suggested antibiotic doses are for normal renal function; adjust for renal impairment when necessary.

**References:** American Academy of Pediatrics Clinical Practice Guideline: Management of Sinusitis. *Pediatrics* 2001; 108:798-808; <http://www.cdc.gov/getsmart/campaign-materials/info-sheets/child-rhin-vs-sinus.html> (accessed 12/30/09)

\*Consider complications of acute sinusitis: may include meningitis, orbital cellulitis, osteomyelitis of sinus bones, invasive fungal superinfection

# Urinary Tract Infection in Children and Adolescents (age >= 3 months)

## Key points

- *E.coli* is the predominant cause of UTI in children and adolescents
- UTI can present with nonspecific symptoms or fever alone in younger children
- Undiagnosed UTI can lead to renal scarring and future sequelae
- Do not culture bag specimens (high false positive rate) – catheterize or suprapubic aspirate if too young to do clean catch
- Obtain clean-catch sample if toilet-trained
- Consider chlamydia and other sexually transmitted infections in adolescents

## Signs, symptoms, and risk factors for urinary tract infection:

### Non-verbal children

- 1) Fever (temperature >39 C) and no other source infection
- 2) Ill-appearing, irritable, poor feeding
- 3) Suprapubic tenderness
- 4) Uncircumcised
- 5) History of UTI
- 6) Family history of genitourinary (GU) abnormality or vesicoureteral reflux (VUR)

### Verbal children

- 1) Dysuria
- 2) Abdominal pain
- 3) Back or flank pain
- 4) New onset incontinence

**\*Pyelonephritis is difficult to distinguish from simple cystitis in younger children**

### Any complicating factors present?

Anatomical GU abnormality or VUR      Immunosuppression or Diabetes  
Nephrolithiasis or Renal Disease      Urinary catheter  
Recent treatment failure      Recent GU instrumentation

Yes

Not covered in this guideline

### Any of the following present?

- Ill-appearing → clinical urosepsis or potential bacteremia
- Vomiting or inability to tolerate oral medication
- Failure to respond to outpatient therapy
- Lack of adequate outpatient follow-up

Yes

Hospital admission

### Diagnostic evaluation

- **Culture should be performed**
- Dipstick analysis 88% sensitivity for UTI – UTI less likely if dip negative, culture if clinically suspicious
- Leukocyte esterase-positive bag specimen – catheterize or suprapubic aspiration
- WBC, ESR, CRP do not distinguish upper tract from lower tract infection

### Treatment options (choice varies with local resistance rates)

**Amoxicillin-clavulanate:** 40 mg/kg/day divided BID (max 875mg BID) OR

**Cephalexin** 50 mg/kg/day divided BID-TID (max 500mg TID) OR

**Cefixime** 8 mg/kg/day divided BID (max 400mg/day) OR

**Cefpodoxime** 10 mg/kg/day divided BID (max 400mg BID) OR

**TMP-SMX** 6-12 mg/kg/day TMP divided BID (max 1 DS tab BID)

**Total duration of therapy: 7-10 days**

### In children >13 years with cystitis and no upper tract signs:

**Nitrofurantoin** 5 to 7 mg/kg/day divided 4 times/day (max 200mg/day) for 7 days OR

**Levofloxacin** 250mg daily for 3 days

Complete therapy - consider further evaluation in appropriate patients

Positive

Culture result

Negative

Call to discontinue antibiotics

**Disclaimer:** This is intended only as a guide for evidence-based decision-making; it is not intended to replace clinical judgment. Assess for antibiotic allergies and use alternative agents as appropriate. Suggested antibiotic doses are for normal renal function; adjust for renal impairment when necessary.

\*Not recommended for males. Contraindicated in patients with a creatinine clearance of less than 60 mL/min

**References:** *Pediatrics* 1999; 103:843-52; American Academy of Pediatrics. *Red Book 2009: Report of the Committee on Infectious Diseases*, 28th ed.

# Skin and Soft Tissue Infection in Children and Adolescents

## Key points

- Beta-hemolytic streptococci are the most common cause of cellulitis without abscess
- MRSA is the most common cause of simple abscess
- Drainage is the primary therapy for simple abscess; antibiotic therapy does not add benefit to drainage alone for small abscesses
- Short-course antibiotic therapy has been shown to be as effective as longer courses

## Possible signs and symptoms of skin and soft tissue infection (SSTI):

- |                       |                            |
|-----------------------|----------------------------|
| 1) Cutaneous erythema | 4) Pain                    |
| 2) Cutaneous warmth   | 5) Tenderness to palpation |
| 3) Swelling           | 6) Fever                   |

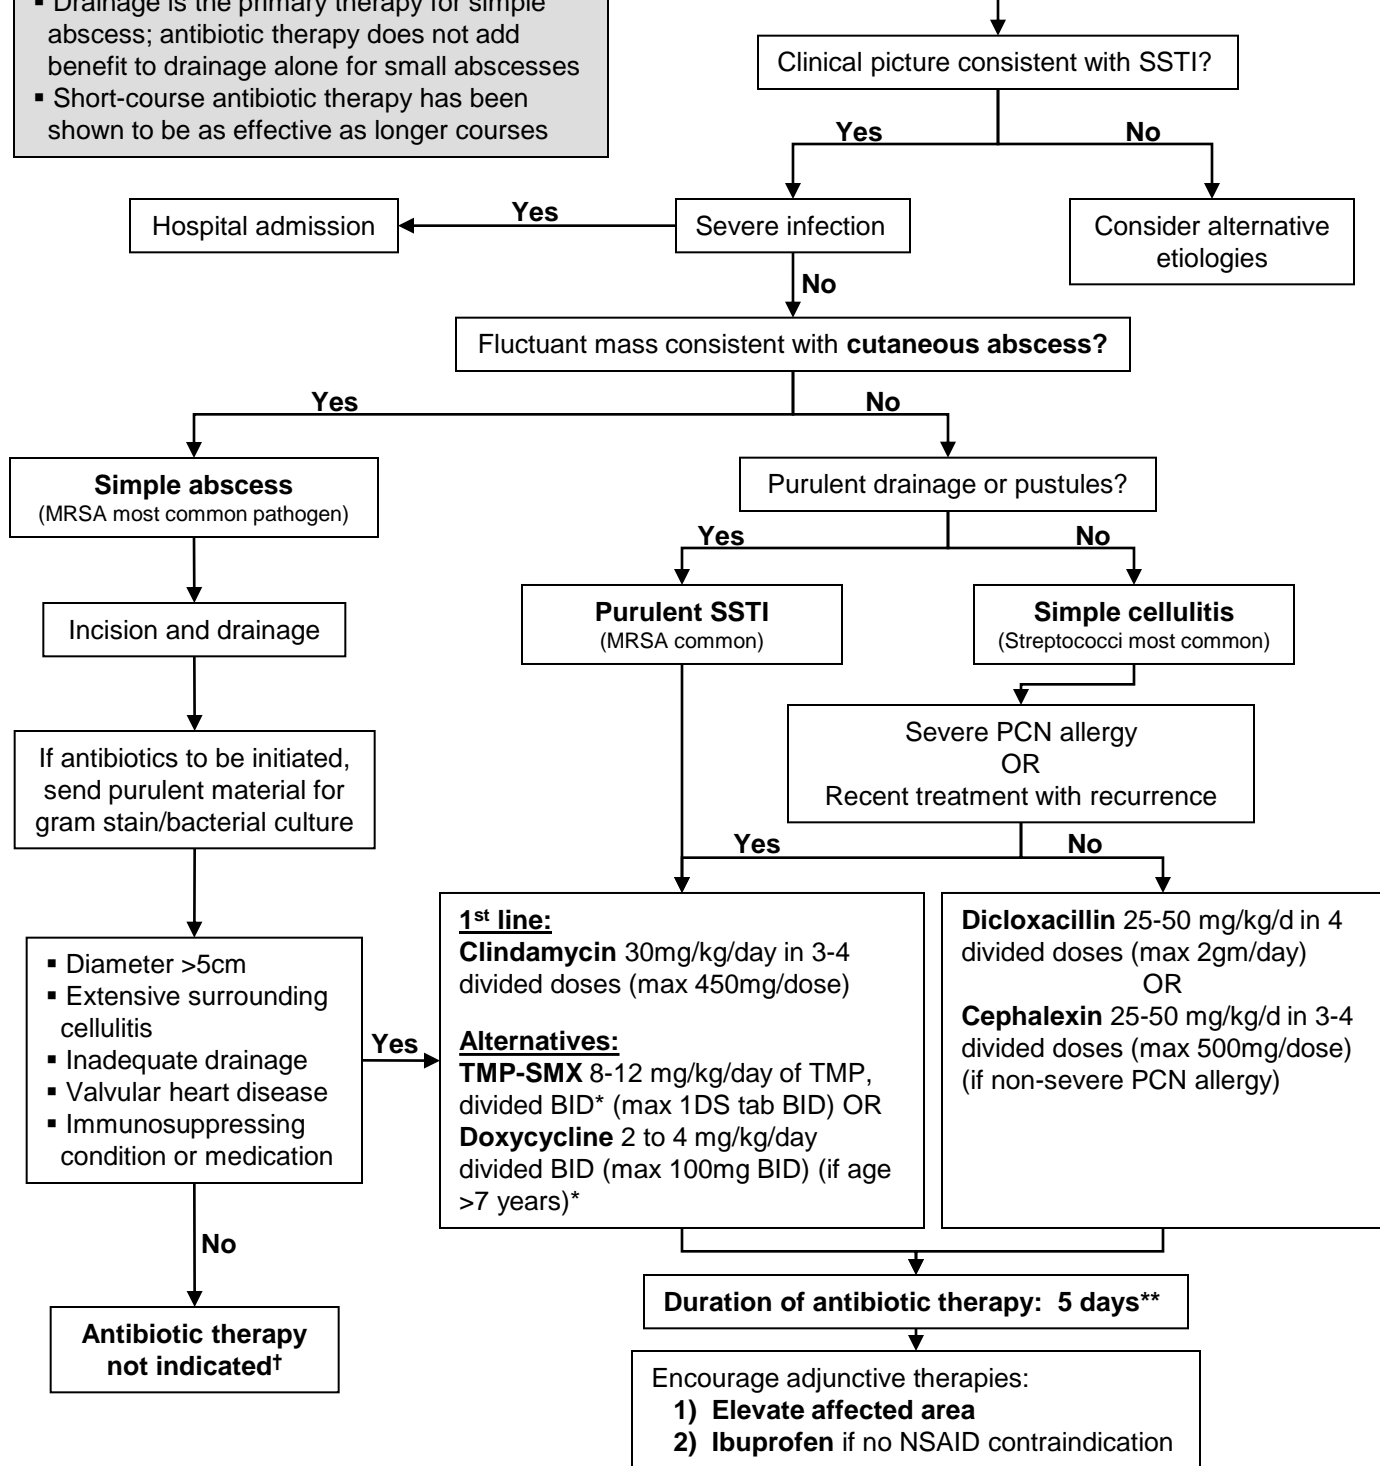

**Disclaimer:** This is intended only as a guide for evidence-based decision-making; it is not intended to replace clinical judgment. Assess for antibiotic allergies and use alternative agents as appropriate. Suggested antibiotic doses are for normal renal function; adjust for renal impairment when necessary.

\*TMP-SMX and doxycycline may lack sufficient coverage against group A streptococci, therefore not optimal for simple cellulitis

\*\*duration of therapy may be extended for poorly responsive disease

† incision and drainage alone may be sufficient for immunocompetent patients with abscess <5 cm: *Ped Infect Dis J* 2004;23:123-7

Reference: Baker, CJ. *AAP News* 2007; 28:1

# Community-Acquired Pneumonia in Children (age >4 months) and Adolescents

## Key points

- *S. pneumoniae* is the most common bacterial cause of pneumonia in childhood
- Viruses are common causes of CAP in younger children (<5 years)
- Atypical organisms (*M. pneumoniae*, *C. pneumoniae*) are common in older children (>= 5 years)
- Microbiologic studies are not indicated for children with CAP treated as outpatients

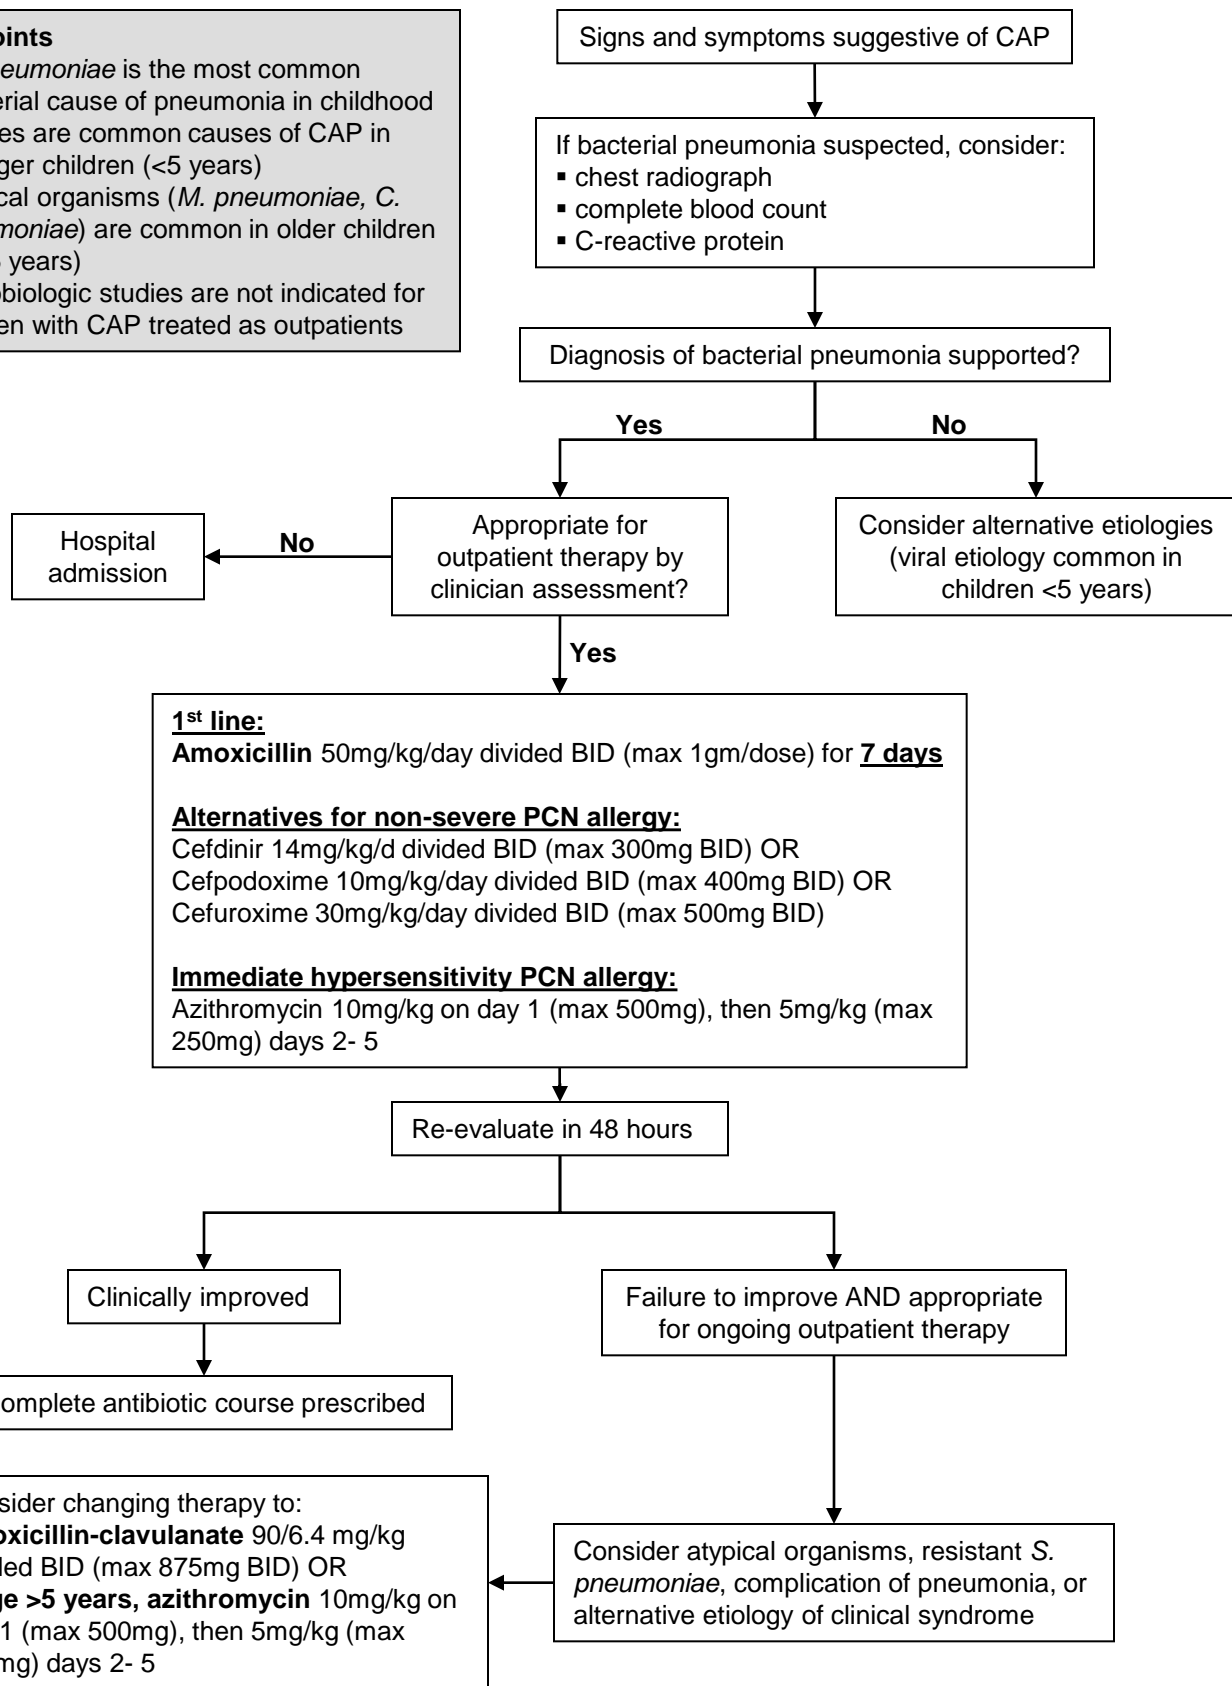

**Disclaimer:** This is intended only as a guide for evidence-based decision-making; it is not intended to replace clinical judgment. Assess for antibiotic allergies and use alternative agents as appropriate. Suggested antibiotic doses are for normal renal function; adjust for renal impairment when necessary.

**References:** British Thoracic Society guidelines for the management of community acquired pneumonia in childhood. *Thorax* 2002; 57 Suppl 1:i1; American Academy of Pediatrics. *Red Book 2009: Report of the Committee on Infectious Diseases*, 28th ed.; *NEJM* 2002; 346:429-37
